# Supplementary material for: Time-resolved X-ray Tracking of Expansion and Compression Dynamics in Supersaturating Ion-Networks
Source: PubMed Central journal article supplement (PMC4677280; doi:10.1038/srep17647), 2015-12-14
Supplement: srep17647-s1.pdf [file srep17647-s1.pdf]

# **Time-resolved X-ray Tracking of Expansion and Compression Dynamics in Supersaturating Ion-Networks**

**Y. Matsushita<sup>1</sup>, H. Sekiguchi<sup>2</sup>, K. Ichiyanagi<sup>3</sup>, N. Ohta<sup>2</sup>, K. Ikezaki<sup>1</sup>,  
Y. Goto<sup>4</sup>, Y. C. Sasaki<sup>1,2</sup>**

**Corresponding author: Y. C. Sasaki  
e-mail: ycsasaki@k.u-tokyo.ac.jp**

1 Graduate School of Frontier Sciences, The University of Tokyo, 5-1-5  
Kashiwanoha, Kashiwa City, Chiba, JAPAN

2 Japan Synchrotron Radiation Research Institute (JASRI) 1-1-1, Kouto, Sayo-  
cho, Sayo-gun, Hyogo 679-5198 JAPAN

3 High Energy Accelerator Research Organization, Photon Factory, 1-1 Oho,  
Tsukuba City, Ibaraki, JAPAN

4 Institute for Protein Research, Osaka University, 3-2, Yamadaoka, Suita City,  
Osaka, JAPAN

## **Supplementary Information**

**-Supplementary Figure**

**-Supplementary Table**

**a**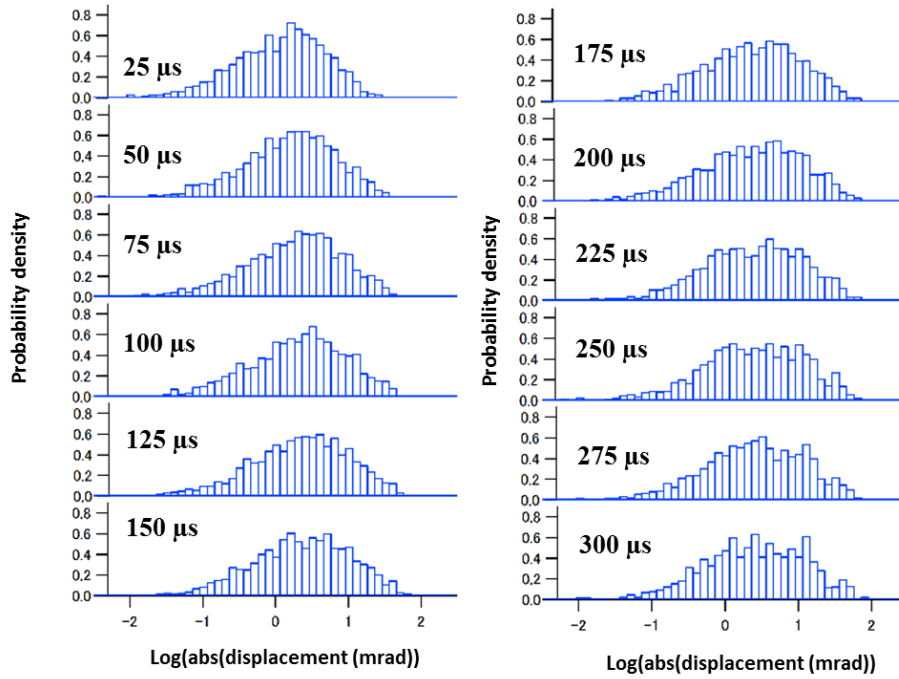**b**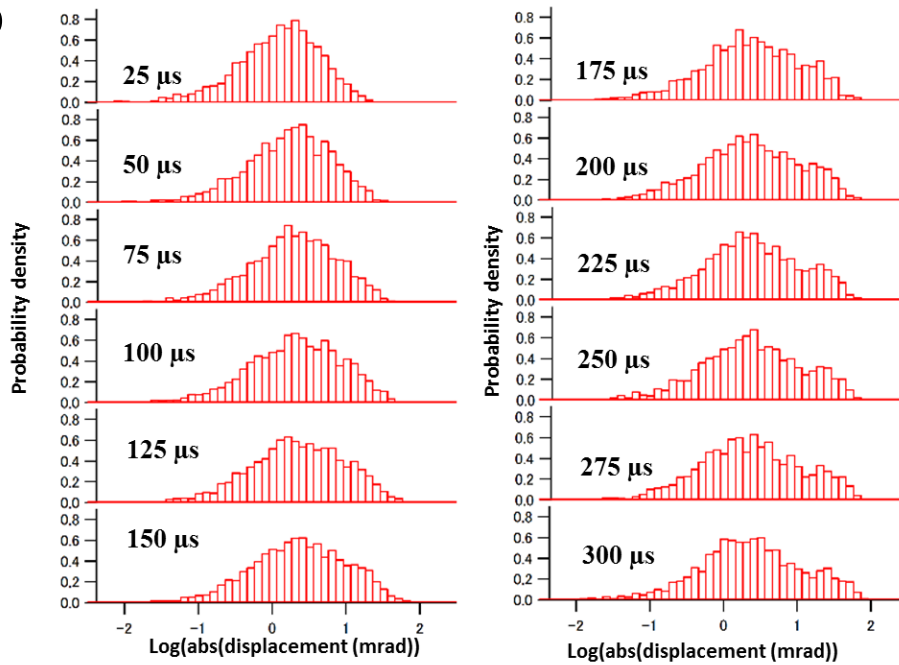

**Supplementary Figure S1 | Distribution of angular displacement in  $\chi$  direction at 25  $\mu\text{s}$  interval until 300  $\mu\text{s}$ . a, b, Angular displacement distribution of gold nanocrystals from saturated (a) and supersaturated condition (b) in units of 25  $\mu\text{s}$ .**

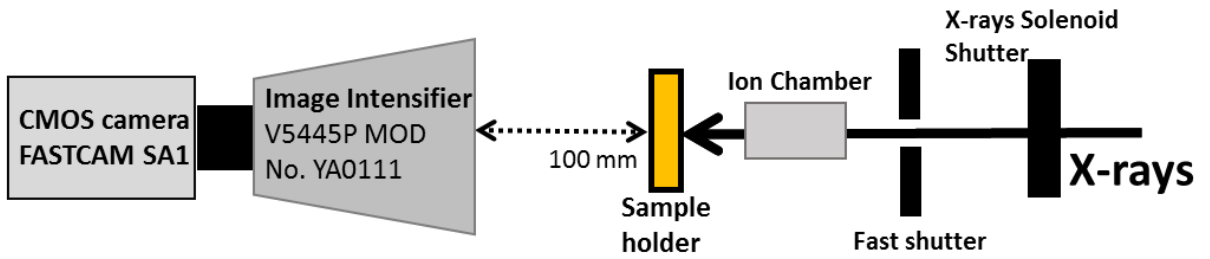

**Supplementary Figure S2 | DXT measurement setup at SPring-8 BL40XU.** X-ray from the BL40XU at SPring-8 with photon flux  $10^{13}$  photons/sec and energy widths ranging from 14.0 – 16.45 keV (Undulator gap = 31.0 mm) were used for DXT measurement. The X-ray exposure time for the sample was adjusted 15 ms in order to avoiding radiation damage. Diffraction spots dynamics from the sample with 25  $\mu$ s interval were detecting by CMOS camera (SA 1.1, Photron, Japan).

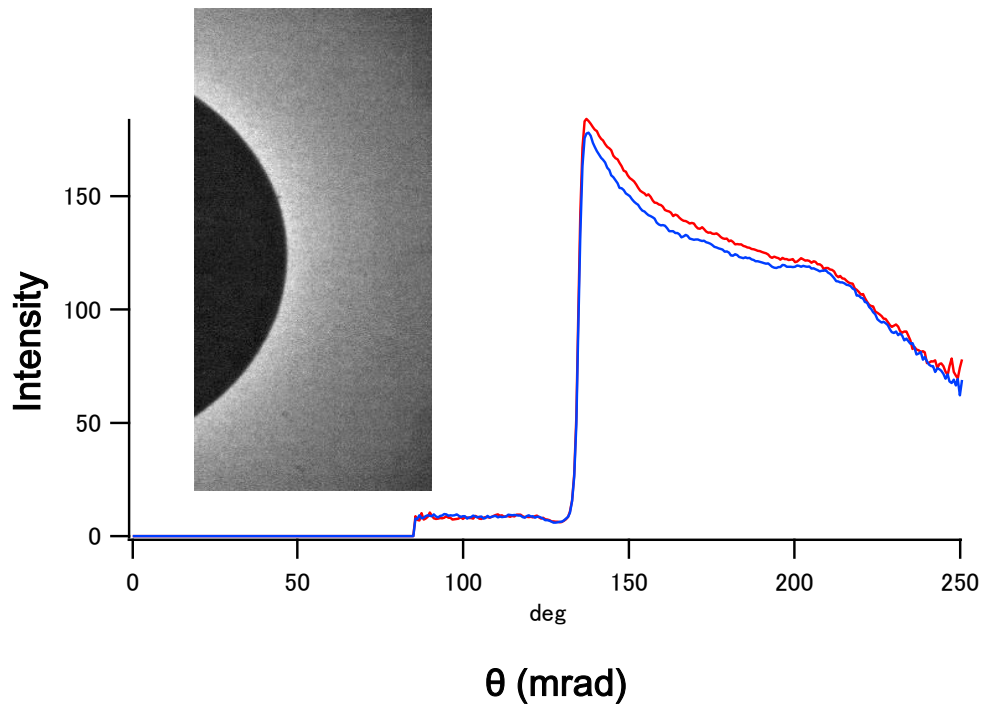

**Supplementary Figure S3 | X-ray scattering intensity from supersaturated condition.** X-ray scattering intensity from supersaturated conditions depend on the  $\theta$  direction. This profile correspond to the back ground intensity of each diffraction spot intensity from DXT measurement.

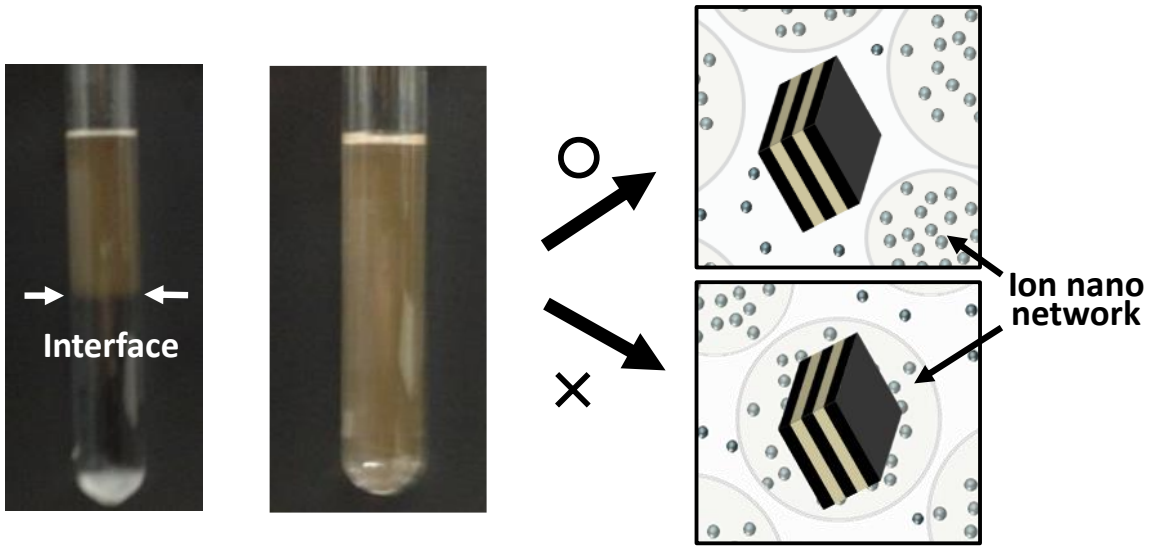

**Supplementary Figure S4 | Macro dissolution and dispersion properties of gold nanocrystals in supersaturated solution.** Gold nanocrystals dispersed in entire solution systems as shown as surface Plasmon resonance from gold nanocrystals were confirmed in throughout entire solution systems.

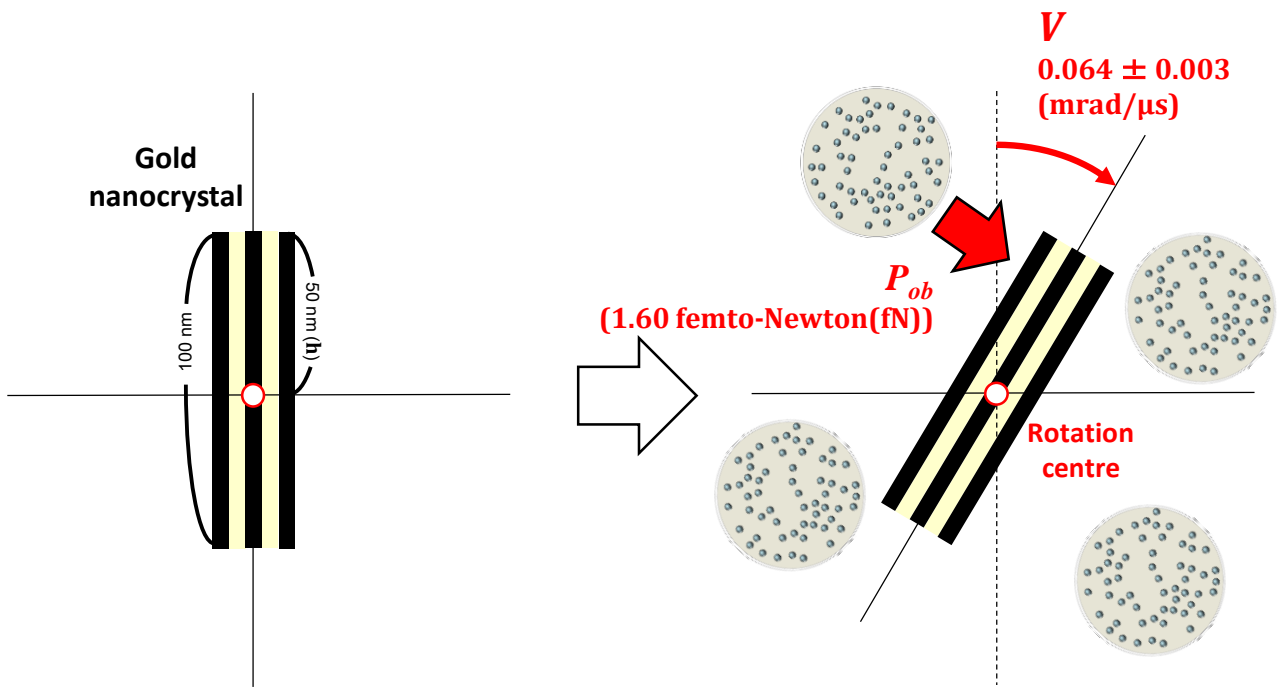

$$P_{ob} = \Gamma / h = 2\pi C_{rd} W / h$$

$$C_{rd} = \pi\eta h^3$$

$$W = V/2\pi$$

$P_{ob}$ : Observed force pressure  $h$ : Radius of a gold nanocrystal

$\Gamma$ : Rotational Torque  $\eta$ : Viscosity of sodium acetate

$V$ : Rotational velocity  $C_{rd}$ : Observed force pressure

**Supplementary Figure S5 | The assumption of the gold nanocrystal dynamics to calculate the observed force pressure  $P_{ob}$ .** The calculation of the observed force pressure  $P_{ob}$ , we based on the assumption that the rotational centre is the centre of a gold nanocrystal. The parameters for the calculation were used by the reference<sup>21, 22</sup>.

## Chi Square $\chi^2$

|                   | Saturated   | Supersaturated |              |
|-------------------|-------------|----------------|--------------|
|                   | Single peak | Single peak    | Double peaks |
| 25 $\mu\text{s}$  | 0.132484    | 0.129273       | -            |
| 50 $\mu\text{s}$  | 0.109049    | 0.188273       | -            |
| 75 $\mu\text{s}$  | 0.164126    | 0.127208       | -            |
| 100 $\mu\text{s}$ | 0.129986    | 0.179066       | -            |
| 125 $\mu\text{s}$ | 0.0814483   | 0.122922       | 0.091808     |
| 150 $\mu\text{s}$ | 0.128428    | 0.222114       | 0.18167      |
| 175 $\mu\text{s}$ | 0.136766    | 0.266943       | 0.19588      |
| 200 $\mu\text{s}$ | 0.144686    | 0.225762       | 0.13692      |
| 225 $\mu\text{s}$ | 0.173474    | 0.262925       | 0.13337      |
| 250 $\mu\text{s}$ | 0.204597    | 0.281508       | 0.17583      |
| 275 $\mu\text{s}$ | 0.202261    | 0.260135       | 0.15406      |
| 300 $\mu\text{s}$ | 0.253876    | 0.277381       | 0.13811      |

**Supplementary Table S1 | Chi square value  $\chi^2$  from regression analysis of log-normal distribution for saturated and supersaturated condition.** Chi square value of saturated condition were obtained by single log-normal distribution fitting. Supersaturated condition were calculated by single and double log-normal distribution.

---

## Fitting parameter of SAXS profile

---

| Sample concentration | n                | A                |
|----------------------|------------------|------------------|
| 6.4 M                | $-2.67 \pm 0.12$ | $-4.20 \pm 0.15$ |
| 6.0 M                | $-1.72 \pm 0.09$ | $-3.10 \pm 0.11$ |
| 3.0 M                | $-1.50 \pm 0.10$ | $-3.20 \pm 0.13$ |

---

**Supplementary Table S2 | Fitting parameter from SAXS profile.**

Parameter from Log – Log linear fitting [  $I(q) = nq + A$  ] process ranging from  $0.04 - 0.06 \text{ nm}^{-1}$  of scattering vector  $q$ . Where the value of  $n$  and  $A$  corresponded to the slope that related to structure size and intercept of SAXS profile respectively.



**a**

|                              | $V$<br>(mrad/ $\mu$ s) | $D$<br>(mrad <sup>2</sup> / $\mu$ s) |
|------------------------------|------------------------|--------------------------------------|
| <b>High displacement (H)</b> | 0.064 $\pm$ 0.003      | 0.28 $\pm$ 0.03                      |

**b**

|                              | $V$<br>(mrad/ $\mu$ s) | $h$<br>(nm) | $\Gamma$<br>(fN nm) | $P_{ob}$<br>(fN) |
|------------------------------|------------------------|-------------|---------------------|------------------|
| <b>High displacement (H)</b> | 0.064 $\pm$ 0.003      | 50          | 76.56 $\pm$ 3.59    | 1.60 $\pm$ 0.07  |

**Supplementary Table S3 | Parameters of anisotropic force by rotational velocity  $V$  from MSD curve of high displacement (H)**

$V$  is the rotational velocity from fitting process for high displacement mode (H) of gold nanocrystals.  $h$  is the gold nanocrystal radius.  $\Gamma$  is a torque from velocity  $V$  and estimated viscosity  $\eta$  of sodium acetate supersaturated solution (6.4 M).  $P_{ob}$  is a observed anisotropic force that affecting a single gold nanocrystals.
